# Supplementary material
Source: publisher figshare collection journal article supplement (https://karger.figshare.com/ndownloader/files/24548555)
Supplement: Supplementary file 1 [file 24548555]

**Table A.1: Relations of JAK 1 gene mutation with other parameters**

|  | **JAK 1** | |  |
| --- | --- | --- | --- |
|  | **Mutant (n=106)** | **Wild (n=57)** | **P value** |
| **Age** |  |  |  |
| Range | 19 - 75 | 19 – 75 |  |
| Mean ± SD | 42.2 ± 12.9 | 43.7 ± 14.9 | 0.570 |
| Median (IQR) | 44 (31 - 51) | 43.5 (30.5 - 57) |  |
| **Sex** |  |  |  |
| Male | 53 (50) | 34 (35.1) | 0.800 |
| Female | 53 (50) | 23 (52.3) |  |
| **Family History** |  |  |  |
| Yes | 11 (10.4) | 6 (13.6) | 0.579 |
| No | 95 (89.6) | 38 (86.4) |  |
| **Smoking** |  |  |  |
| Yes | 33 (31.1) | 12 (27.3) | 0.639 |
| No | 73 (68.9) | 32 (72.7) |  |
| **Course** |  |  |  |
| Progressive | 52 (49.1) | 21 (47.7) | 0.286 |
| Remissions & exacerbations | 54 (50.9) | 23 (52.3) |  |
| Regressive | 0 (0) | 1 (2.3) |  |
| **Extent %** |  |  |  |
| Range | 0 - 85 | 0 - 70 |  |
| Mean ± SD | 21.9 ± 21.1 | 19.5 ± 18.6 | 0.673 |
| Median (IQR) | 15 (5 - 35) | 10 (5.5 - 25) |  |
| **PASI Score** |  |  |  |
| Range | 0.4 - 35.8 | 0.3 - 42 |  |
| Mean ± SD | 8.4 ± 6.8 | 8 ± 7.7 | 0.493 |
| Median (IQR) | 7.2 (3.2 - 11.4) | 5.9 (3 - 10.3) |  |
| **Diabetes** |  |  |  |
| Yes | 19 (17.9) | 14 (31.8) | 0.061 |
| No | 87 (82.1) | 30 (68.2) |  |
| **Hypertension** |  |  |  |
| Yes | 40 (37.7) | 17 (38.6) | 0.918 |
| No | 66 (62.3) | 27 (61.4) |  |
| **Metabolic Syndrome** |  |  |  |
| Yes | 30 (28.3) | 14 (31.8) | 0.667 |
| No | 76 (71.7) | 30 (68.2) |  |

IQR: interquartile range (25th – 75th percentiles range), n: number, SD: standard deviation

**Table A.2: Relations of JAK 3 gene mutation with other parameters**

|  | **JAK3** | |  |
| --- | --- | --- | --- |
|  | **Mutant (n=131)** | **Wild (n=19)** | **P value** |
| **Age** |  |  |  |
| Range | 19 - 75 | 23 - 63 |  |
| Mean ± SD | 42.7 ± 13.6 | 42 ± 13.1 | 0.908 |
| Median (IQR) | 44 (31 - 53) | 42 (30 - 55) |  |
| **Sex** |  |  |  |
| Male | 70 (53.4) | 4 (21.1) | **0.013** |
| Female | 61 (46.6) | 15 (78.9) |  |
| **Family History** |  |  |  |
| Yes | 16 (12.2) | 1 (5.3) | 0.698 |
| No | 115 (87.8) | 18 (94.7) |  |
| **Smoking** |  |  |  |
| Yes | 42 (32.1) | 3 (15.8) | 0.148 |
| No | 89 (67.9) | 16 (84.2) |  |
| **Course** |  |  |  |
| Progressive | 65 (49.6) | 7 (36.8) | 0.522 |
| Remissions & exacerbations | 65 (49.6) | 12 (63.2) |  |
| Regressive | 1 (0.8) | 0 (0) |  |
| **Extent %** |  |  |  |
| Range | 0 - 85 | 1 - 70 |  |
| Mean ± SD | 20.5 ± 20.1 | 26.1 ± 22 | 0.176 |
| Median (IQR) | 12 (5 - 30) | 20 (10 - 35) |  |
| **PASI Score** |  |  |  |
| Range | 0.3 - 35.8 | 1 - 42 |  |
| Mean ± SD | 8 ± 6.6 | 10.4 ± 9.6 | 0.358 |
| Median (IQR) | 6.6 (3.2 - 11) | 9.9 (2.8 - 14.6) |  |
| **Diabetes** |  |  |  |
| Yes | 29 (22.1) | 4 (21.1) | 1.000 |
| No | 102 (77.9) | 15 (78.9) |  |
| **Hypertension** |  |  |  |
| Yes | 52 (39.7) | 5 (26.3) | 0.262 |
| No | 79 (60.3) | 14 (73.7) |  |
| **Metabolic Syndrome** |  |  |  |
| Yes | 40 (30.5) | 4 (21.1) | 0.396 |
| No | 91 (69.5) | 15 (78.9) |  |

IQR: interquartile range (25th – 75th percentiles range), n: number, SD: standard deviation
